# Supplementary material for: An ACAT inhibitor suppresses SARS-CoV-2 replication and boosts antiviral T cell activity
Source: PubMed Central journal article supplement (PMC10202285; doi:10.1371/journal.ppat.1011323), 2023-05-03
Supplement: ppat.1011323.s003.pdf [file ppat.1011323.s003.pdf]

S3 Fig

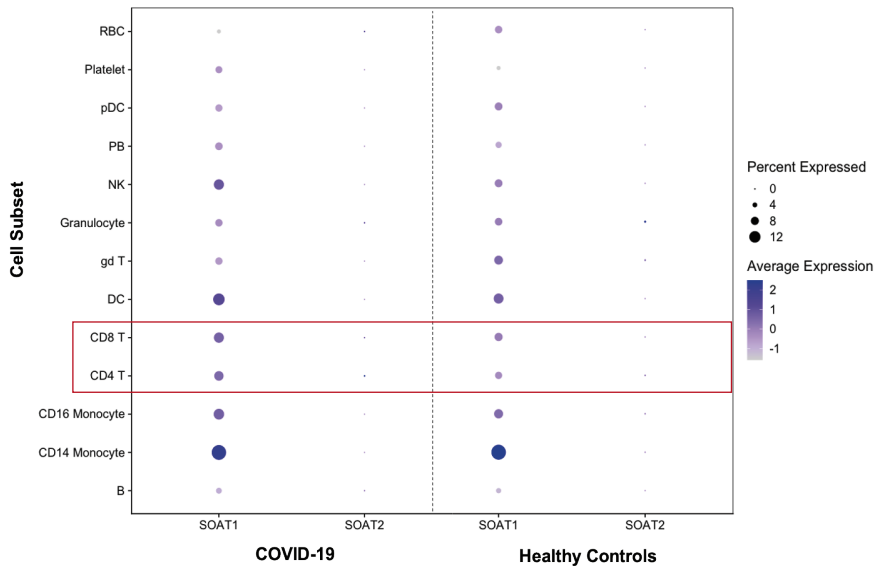

| SOAT1         | COVID-19           |                    | Healthy Control    |                    | SOAT2         | COVID-19           |                    | Healthy Control    |                    |
|---------------|--------------------|--------------------|--------------------|--------------------|---------------|--------------------|--------------------|--------------------|--------------------|
|               | Average Expression | Average Expression | Average Expression | Average Expression |               | Average Expression | Average Expression | Average Expression | Average Expression |
| RBC           | 0.03               | 0.07               |                    |                    | RBC           | 0.00               | 0.00               |                    |                    |
| Platelet      | 0.07               | 0.03               |                    |                    | Platelet      | 0.00               | 0.00               |                    |                    |
| pDC           | 0.07               | 0.08               |                    |                    | pDC           | 0.00               | 0.00               |                    |                    |
| PB            | 0.07               | 0.06               |                    |                    | PB            | 0.00               | 0.00               |                    |                    |
| NK            | 0.11               | 0.09               |                    |                    | NK            | 0.00               | 0.00               |                    |                    |
| Granulocyte   | 0.07               | 0.09               |                    |                    | Granulocyte   | 0.00               | 0.01               |                    |                    |
| gd T          | 0.07               | 0.10               |                    |                    | gd T          | 0.00               | 0.00               |                    |                    |
| DC            | 0.12               | 0.11               |                    |                    | DC            | 0.00               | 0.00               |                    |                    |
| CD8 T         | 0.10               | 0.08               |                    |                    | CD8 T         | 0.00               | 0.00               |                    |                    |
| CD4 T         | 0.10               | 0.09               |                    |                    | CD4 T         | 0.00               | 0.00               |                    |                    |
| CD16 Monocyte | 0.11               | 0.10               |                    |                    | CD16 Monocyte | 0.00               | 0.00               |                    |                    |
| CD14 Monocyte | 0.16               | 0.17               |                    |                    | CD14 Monocyte | 0.00               | 0.00               |                    |                    |
| B             | 0.05               | 0.05               |                    |                    | B             | 0.00               | 0.00               |                    |                    |
