# Supplementary material for: An ACAT inhibitor suppresses SARS-CoV-2 replication and boosts antiviral T cell activity
Source: PubMed Central journal article supplement (PMC10202285; doi:10.1371/journal.ppat.1011323), 2023-05-03

S4 Fig

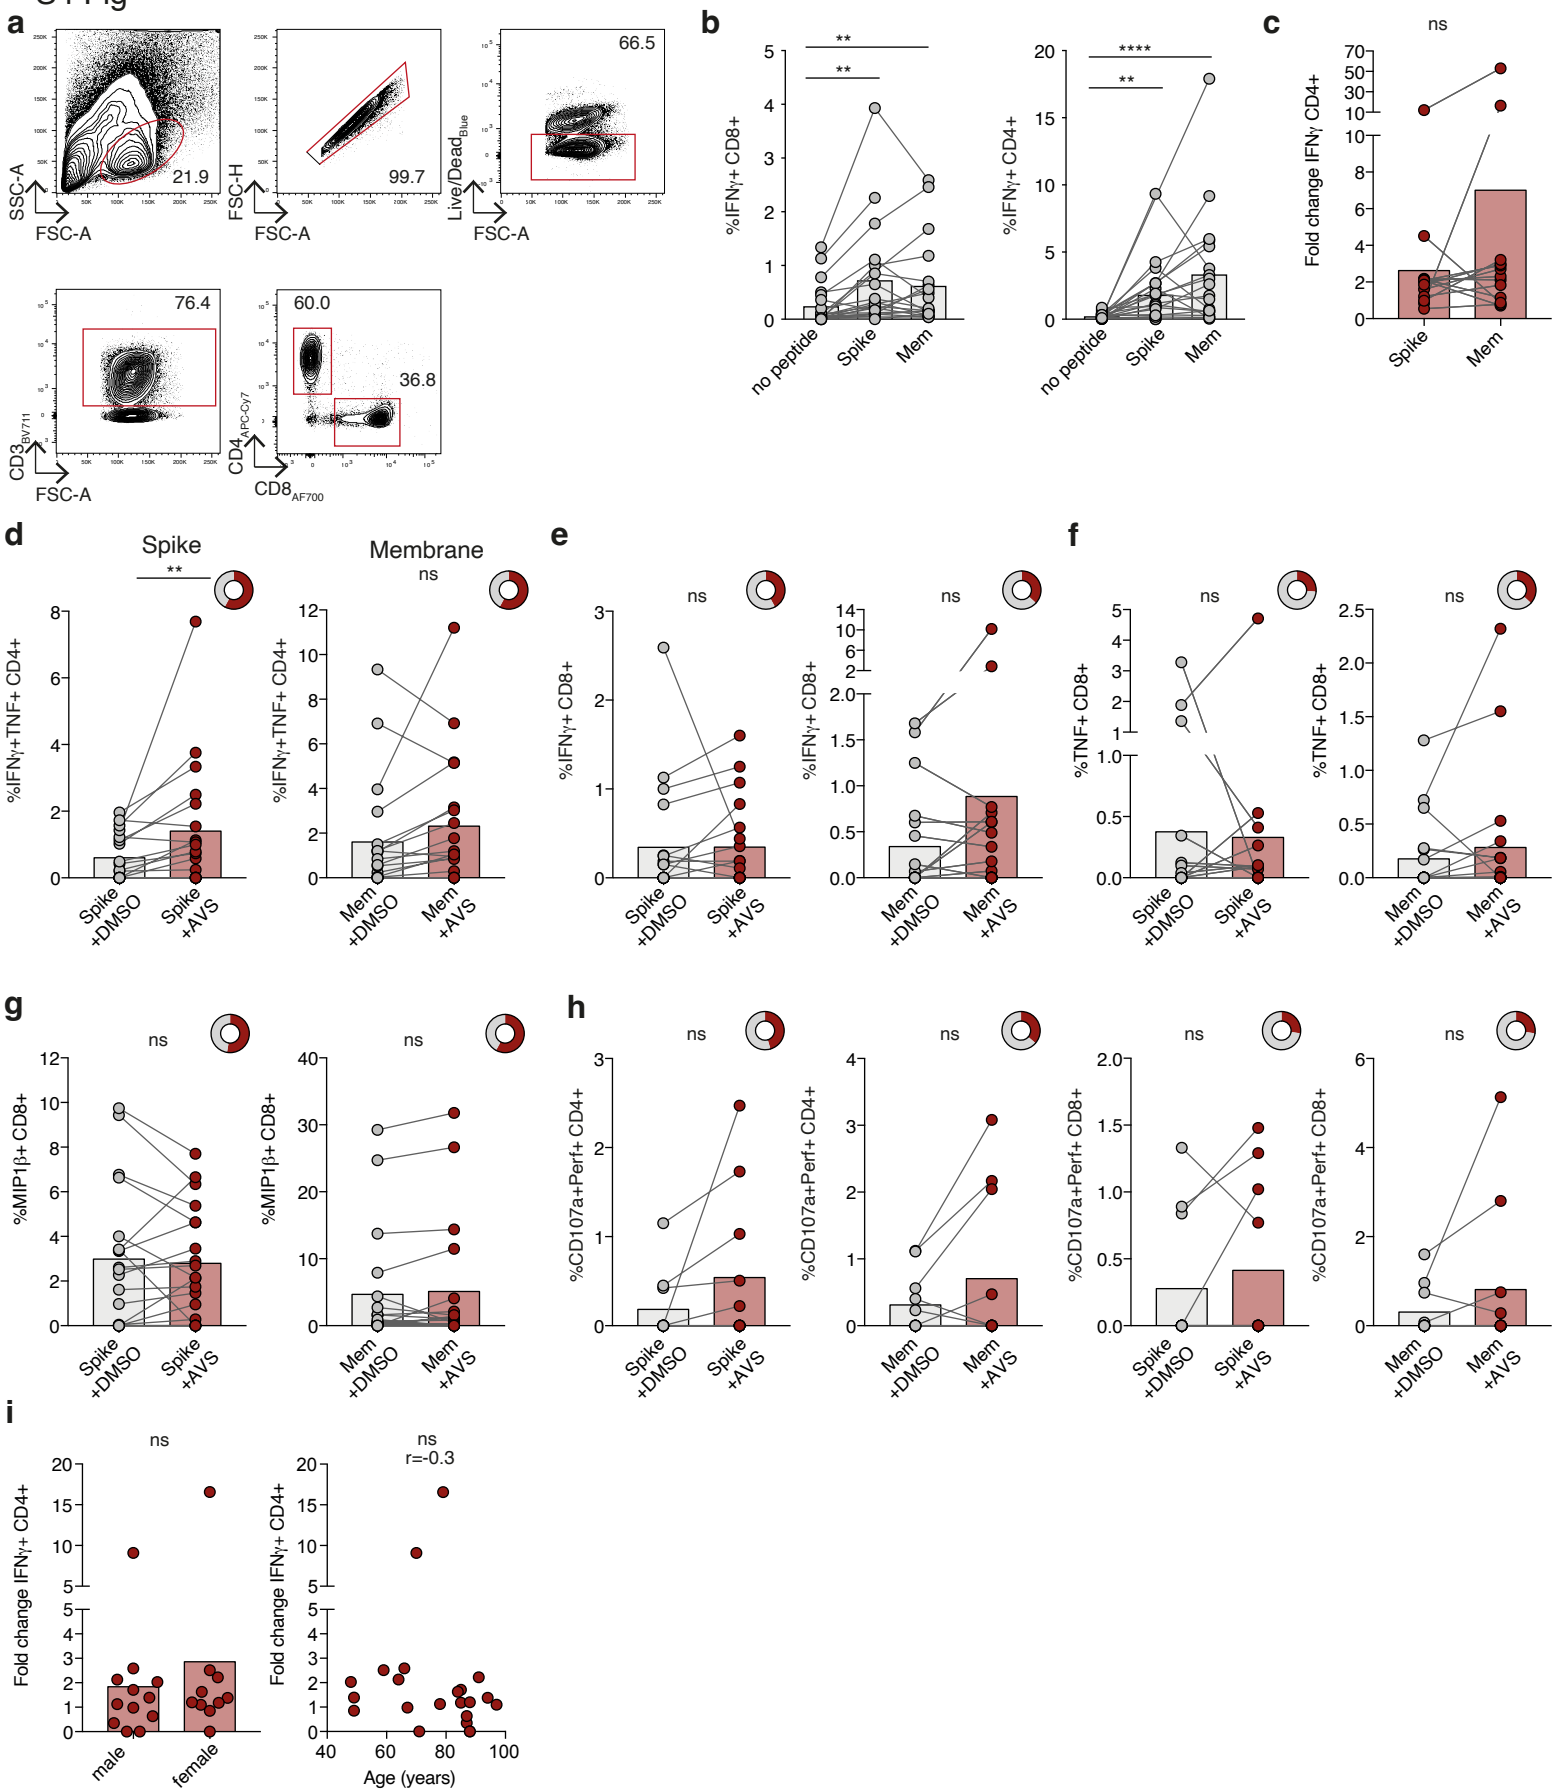

Supplement: ppat.1011323.s004.pdf [file ppat.1011323.s004.pdf]
