# Supplementary material for: An ACAT inhibitor suppresses SARS-CoV-2 replication and boosts antiviral T cell activity
Source: PubMed Central journal article supplement (PMC10202285; doi:10.1371/journal.ppat.1011323), 2023-05-03
Supplement: ppat.1011323.s006.pdf [file ppat.1011323.s006.pdf]

**Supplementary Table 1 Fluorescent reagents for flow cytometry**

| Antigen                                              | Fluorochrome    | Clone    | Supplier       | Catalogue number |
|------------------------------------------------------|-----------------|----------|----------------|------------------|
| <b>Monoclonal antibodies for flow cytometry</b>      |                 |          |                |                  |
| CD3                                                  | BUV805          | UCHT1    | BD Biosciences | 612895           |
| CD4                                                  | BUV395          | SK3      | BD Biosciences | 563550           |
| CD8                                                  | Alexa Fluor 700 | RPA-T8   | BioLegend      | 301028           |
| CD8                                                  | BV785           | RPA-T8   | BioLegend      | 301046           |
| CD154                                                | PE/Cyanine7     | 24-31    | BioLegend      | 310832           |
| IFN $\gamma$                                         | V450            | B27      | BD Biosciences | 560371           |
| TNF                                                  | APC/Cyanine7    | MAb11    | BioLegend      | 502944           |
| TNF                                                  | PE/Dazzle 594   | MAb11    | BioLegend      | 502945           |
| MIP1b                                                | PE              | D21-1351 | BD Biosciences | 550078           |
| Perforin                                             | APC/Cyanine7    | dG9      | BioLegend      | 308128           |
| Perforin                                             | PE/Dazzle 594   | dG9      | BioLegend      | 308132           |
| Perforin                                             | PerCP/Cy5.5     | B-D48    | BioLegend      | 353314           |
| CD107a                                               | APC             | H4A3     | BioLegend      | 328620           |
| <b>Other fluorescent reagents for flow cytometry</b> |                 |          |                |                  |
| Vybrant CFDA SE Cell Tracer Kit                      | na              | na       | Invitrogen     | V12883           |
| LIVE/DEAD Fixable Blue Dead Cell Stain Kit           | na              | na       | Invitrogen     | L23105           |
